# Supplementary material
Source: PubMed Central journal article supplement (PMC7309342)
Supplement: candisc-10-783-s001.pdf [file candisc-10-783-s001.pdf]

## **Supplementary Appendix**

### **List of hospitals reporting cases:**

Zhongnan Hospital of Wuhan University, Union Hospital affiliated to Tongji Medical College of Huazhong University of Science and Technology, Tongji Hospital affiliated to Tongji Medical College of Huazhong University of Science and Technology, Renmin Hospital of Wuhan University, Hubei Cancer Hospital, The Leishenshan Hospital, The Central Hospital of Wuhan affiliated to Tongji Medical College of Huazhong University of Science and Technology, Wuhan Seventh hospital, Wuhan Puren hospital, The Central Hospital of Huanggang, The Central Hospital of Xianning, Xiangyang First People's Hospital affiliated to Hubei University of Medicine, The People's Hospital of Shiyan, The People's Hospital of Huangmei.

**Supplementary Figure 1. Multivariable logistic regression of COVID-19 patients**

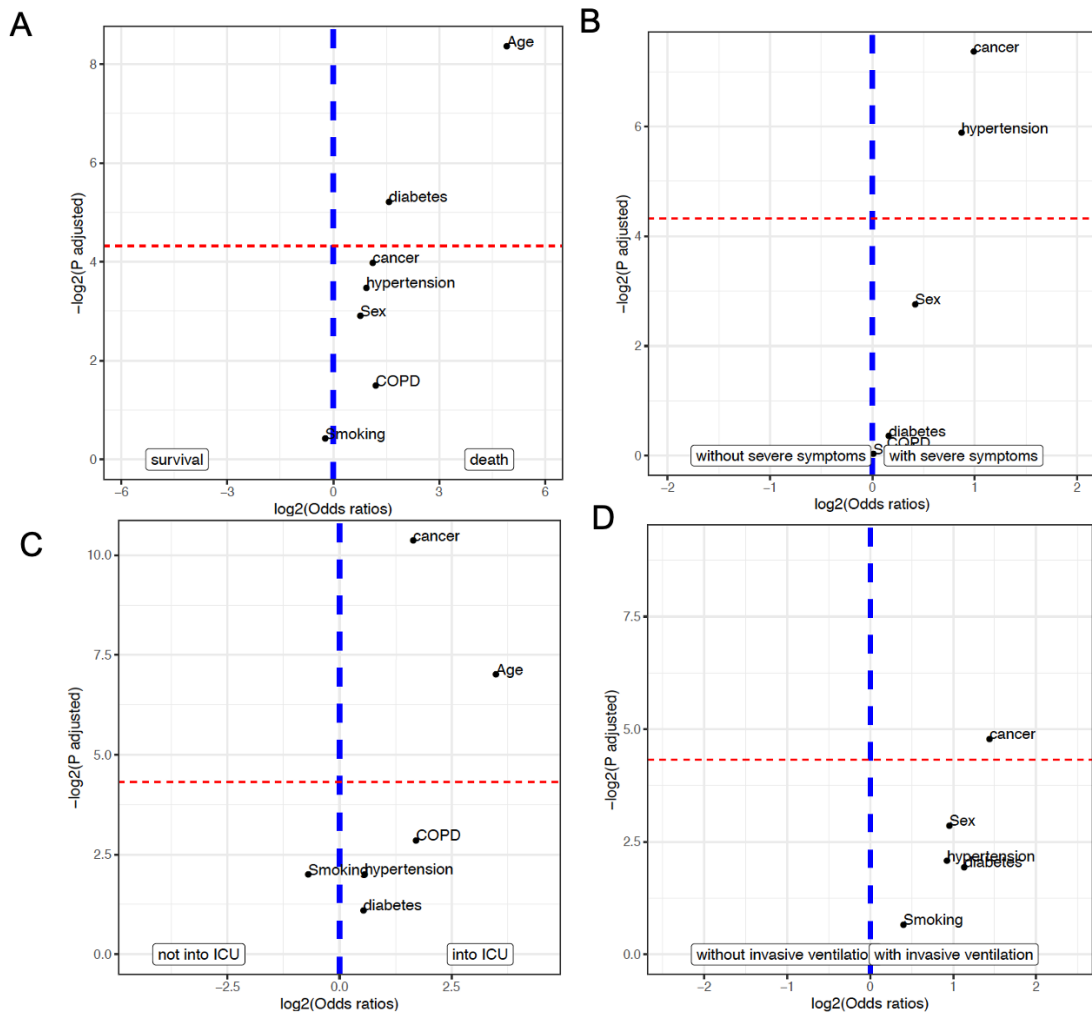

**Supplementary Figure 1.** Multivariable logistic regression of severe conditions vs age, sex, smoking, diabetes, hypertension, COPD and cancer. X axis shows odds ratios of the factors in the association. Y axis indicates  $-\log_2(p)$  values). The higher the points along Y axis the more significant the association appears. The red color dashed line indicates  $p$  values  $\leq 0.05$ . (A) logistic regression of death, (B) logistic regression of experiencing any severe symptoms, (C) logistic regression of ICU admission, (D) logistic regression of utilization of invasive mechanical ventilation vs age, sex, smoking, diabetes, hypertension, COPD and cancer; Odds Ratio, 95% CI and  $p$  values are listed in Supplementary Table 1. Abbreviations: ICU=intensive care unit; COPD=Chronic Obstructive Pulmonary Disease.

**Supplementary Table 1. Logistic regression results of COVID-19 patients**

| Outcome         | Odds Ratio | 95% CI lower | 95% CI upper | p value | Features     |
|-----------------|------------|--------------|--------------|---------|--------------|
| Death           | 2.171      | -0.806       | 5.149        | 0.064   | Cancer       |
|                 | 30.103     | 23.918       | 36.289       | 0.003   | Age          |
|                 | 1.696      | -1.093       | 4.485        | 0.134   | Sex          |
|                 | 2.983      | -0.229       | 6.195        | 0.027   | Diabetes     |
|                 | 1.914      | -0.961       | 4.788        | 0.090   | Hypertension |
|                 | 2.300      | -2.533       | 7.134        | 0.356   | COPD         |
|                 | 0.854      | -2.357       | 4.065        | 0.749   | Smoking      |
| Severe symptoms | 1.987      | -0.530       | 4.505        | 0.006   | Cancer       |
|                 | 0.219      | -3.502       | 3.940        | 0.018   | Age          |
|                 | 1.337      | -1.058       | 3.731        | 0.148   | Sex          |
|                 | 1.118      | -1.813       | 4.048        | 0.782   | Diabetes     |
|                 | 1.829      | -0.695       | 4.353        | 0.017   | Hypertension |
|                 | 1.104      | -3.483       | 5.692        | 0.907   | COPD         |
|                 | 1.007      | -1.615       | 3.628        | 0.982   | Smoking      |
| ICU             | 3.129      | 0.379        | 5.880        | 0.001   | Cancer       |
|                 | 11.242     | 6.376        | 16.108       | 0.008   | Age          |
|                 | 1.445      | -1.811       | 4.700        | 0.469   | Diabetes     |
|                 | 1.472      | -1.271       | 4.216        | 0.250   | Hypertension |
|                 | 3.267      | -1.095       | 7.629        | 0.139   | COPD         |
|                 | 0.615      | -2.382       | 3.611        | 0.251   | Smoking      |
| IMV             | 2.709      | -0.448       | 5.866        | 0.037   | Cancer       |
|                 | 0.011      | -8.295       | 8.317        | 0.002   | Age          |
|                 | 1.936      | -1.124       | 4.995        | 0.138   | Sex          |
|                 | 2.193      | -1.758       | 6.144        | 0.263   | Diabetes     |
|                 | 1.898      | -1.477       | 5.274        | 0.238   | Hypertension |
|                 | NA         | NA           | NA           | NA      | COPD         |
|                 | 1.318      | -2.178       | 4.815        | 0.633   | Smoking      |

Abbreviations: ICU=intensive care unit; IMV=invasive mechanical ventilation; COPD=Chronic Obstructive Pulmonary Disease.

**Supplementary Table 2. Pair-wise comparison between different subgroups of COVID-19 patients**

| Item                                                                        | Odd Ratio |      |                 |       | 95% CI        |               |                 |                 | p value |       |                 |       | IL-6                               |         |
|-----------------------------------------------------------------------------|-----------|------|-----------------|-------|---------------|---------------|-----------------|-----------------|---------|-------|-----------------|-------|------------------------------------|---------|
|                                                                             | Death     | ICU  | Severe symptoms | IMV   | Death         | ICU           | Severe symptoms | IMV             | Death   | ICU   | Severe symptoms | IMV   | Mean (SD)                          | p value |
| Cancer vs No cancer                                                         | 2.34      | 2.84 | 2.79            | 14    | [1.15, 4.77]  | [1.59, 5.08]  | [1.74, 4.41]    | [4.30, 45.56]   | 0.03    | <0.01 | <0.01           | <0.01 | 73.13 (130.55) vs 35.50 (71.38)    | 0.91    |
| Hematological cancer vs No cancer                                           | 9.07      | 9.66 | 10.61           | 38    | [2.16, 38.18] | [2.49, 37.36] | [2.60, 43.25]   | [5.95, 242.63]  | 0.01    | <0.01 | <0.01           | <0.01 | 112.71 (147.79) vs 35.50 (71.38)   | 0.20    |
| Metastatic cancer vs No cancer                                              | 5.58      | 6.59 | 5.97            | 55.42 | [1.71, 18.23] | [2.32, 18.72] | [2.24, 15.91]   | [13.21, 232.47] | 0.01    | <0.01 | <0.01           | <0.01 | 24.22 (21.87) vs 35.50 (71.38)     | 0.79    |
| Non-metastatic cancer vs No cancer                                          | 0.83      | 1.47 | 1.87            | 2.97  | [0.19, 3.58]  | [0.55, 3.93]  | [0.93, 3.76]    | [0.32, 27.01]   | 1       | 0.39  | 0.10            | 0.34  | 51.41 (102.94) vs 35.50 (71.38)    | 0.62    |
| Lung cancer vs Other cancers without lung metastasis                        | 0.27      | 0.25 | 0.21            | 0.07  | [0.09, 0.84]  | [0.09, 0.67]  | [0.09, 0.50]    | [0.02, 0.24]    | 0.03    | 0.01  | <0.01           | <0.01 | 176.98 (187.42) vs 40.63 (83.09)   | 0.02    |
| Other cancers with lung metastasis vs Other cancers without lung metastasis | 3.56      | 4.43 | 5.29            | 14.45 | [0.98, 12.96] | [1.50, 13.04] | [1.99, 14.03]   | [3.53, 59.20]   | 0.08    | 0.01  | <0.01           | <0.01 | 142.73 (140.59) vs 40.63 (83.09)   | 0.62    |
| Lung cancer vs Other cancers with lung metastasis                           | 0.96      | 1.11 | 1.12            | 0.96  | [0.19, 5.03]  | [0.27, 4.52]  | [0.32, 3.99]    | [0.18, 5.03]    | 1       | 1     | 1               | 1     | 176.98(187.42) vs 142.74 (140.59)  | 0.06    |
| Cancer surgery vs No cancer                                                 | 6.05      | 7.24 | 8.84            | 44.33 | [1.17, 31.33] | [1.67, 31.39] | [2.07, 37.70]   | [6.78, 290.09]  | 0.07    | 0.02  | <0.01           | <0.01 | 259.48 (197.36) vs. 35.50 (71.38)  | 0.41    |
| Cancer radiotherapy vs No cancer                                            | 1.65      | 1.09 | 1.77            | 12.09 | [0.21, 13.23] | [0.14, 8.71]  | [0.47, 6.67]    | [1.25, 117.17]  | 0.48    | 1     | 0.42            | 0.11  | 5.84 (3.68) vs. 35.50 (71.38)      | 0.49    |
| Cancer chemotherapy vs No cancer                                            | 4.54      | 4.39 | 3.54            | 20.46 | [1.21, 16.99] | [1.34, 14.40] | [1.23, 10.20]   | [3.44, 121.86]  | 0.05    | 0.03  | 0.03            | 0.01  | 117.65 (149.38) vs. 35.50 (71.38)  | 0.07    |
| Cancer targeted therapy vs No cancer                                        | 0         | 0    | 1.769           | 0     | [0.12, 43.96] | [0.08, 29.04] | [0.18, 17.21]   | [0.75, 369.09]  | 1       | 1     | 0.50            | 1     | NA                                 | NA      |
| Cancer immunotherapy vs No cancer                                           | 9.07      | 2.41 | 10.61           | 0     | [1.59, 51.66] | [0.28, 21.16] | [1.91, 58.86]   | [0.53, 33.58]   | 0.04    | 0.40  | <0.01           | 1     | 375.05(11.05) vs. 35.50 (71.38)    | 0.80    |
| Cancer with active treatment vs Cancer without active treatment             | 1.16      | 0.97 | 1.49            | 1.59  | [0.32, 4.17]  | [0.34, 2.81]  | [0.63, 3.52]    | [0.42, 6.09]    | 1       | 1     | 0.38            | 0.49  | 111.33 (164.69) vs. 52.30 (101.58) | 0.56    |

---

|                                              |      |      |      |       |              |              |              |               |      |       |       |       |                                 |      |
|----------------------------------------------|------|------|------|-------|--------------|--------------|--------------|---------------|------|-------|-------|-------|---------------------------------|------|
| Cancer without active treatment vs No cancer | 2.23 | 2.87 | 2.44 | 11.91 | [0.98, 5.11] | [1.47, 5.56] | [1.42, 4.21] | [3.28, 43.29] | 0.06 | <0.01 | <0.01 | <0.01 | 52.30 (101.58) vs 35.50 (71.38) | 0.80 |
|----------------------------------------------|------|------|------|-------|--------------|--------------|--------------|---------------|------|-------|-------|-------|---------------------------------|------|

---

Abbreviations: ICU=intensive care unit; IMV=invasive mechanical ventilation

**Supplementary Table 3. Hazard ratios and 95% confidence intervals from Cox-regression models for risks of severe events**

|                                       | <b>Hazard Ratio</b> | <b>95% CI lower</b> | <b>95% CI higher</b> | <b>p values</b> |
|---------------------------------------|---------------------|---------------------|----------------------|-----------------|
| <b>All Cancer</b>                     | 2.52                | 1.66                | 3.83                 | <0.01           |
| <b>Cancer types</b>                   |                     |                     |                      |                 |
| Blood cancer                          | 6.30                | 2.66                | 14.94                | <0.01           |
| Lung cancer                           | 2.59                | 1.34                | 5.01                 | <0.01           |
| Stomach cancer                        | 2.45                | 0.89                | 6.72                 | 0.08            |
| Breast cancer                         | 1.46                | 0.35                | 6.12                 | 0.60            |
| <b>Cancer stage</b>                   |                     |                     |                      |                 |
| Metastatic cancer                     | 2.48                | 1.19                | 5.14                 | 0.01            |
| Non-metastatic cancer                 | 1.79                | 0.96                | 3.32                 | 0.07            |
| <b>Lung cancer or lung metastasis</b> |                     |                     |                      |                 |
| Lung cancer                           | 2.60                | 1.34                | 5.01                 | <0.01           |
| Other cancers with lung metastasis    | 2.58                | 1.26                | 5.29                 | <0.01           |
| Other cancers without lung metastasis | 0.34                | 0.18                | 0.63                 | 0.06            |
| <b>Cancer treatments</b>              |                     |                     |                      |                 |
| Immunotherapy                         | 4.82                | 1.73                | 13.48                | <0.01           |
| Surgery                               | 6.22                | 2.44                | 15.83                | <0.01           |
| Chemotherapy                          | 1.54                | 0.65                | 3.68                 | 0.36            |
| Radiotherapy                          | 1.22                | 0.37                | 4.01                 | 0.74            |
| Targeted therapy                      | 1.51                | 0.21                | 10.89                | 0.68            |

Hazard Ratio and 95% CI denoted the comparison between cancer subgroups and patients without cancer.

**Supplementary Table 4. Detailed information of 105 COVID-19 patients with cancer**

| Patient ID | Sex    | Age | Comorbidities                                                                               | Time*   | Tumor type                         | Phase   | Smoking history | Cancer treatments within 40 days                   | Last time of treatments | Severe events | Survival status |
|------------|--------|-----|---------------------------------------------------------------------------------------------|---------|------------------------------------|---------|-----------------|----------------------------------------------------|-------------------------|---------------|-----------------|
| No.1       | Male   | 69  | Intestinal obstruction                                                                      | 2019.12 | Peritoneal cancer                  | II      | Former smoker   |                                                    |                         | Yes           | Dead            |
| No.2       | Male   | 66  | Jaundice, Abdominal infection, Chest infection                                              | 2019.11 | Gastric cancer                     | IV      | Current smoker  |                                                    |                         | No            | Alive           |
| No.3       | Male   | 49  | No                                                                                          | 2020.01 | Esophageal squamous cell carcinoma | Unknown | Never smoked    |                                                    |                         | Yes           | Alive           |
| No.4       | Male   | 65  | No                                                                                          | 2018.01 | Gastric cancer                     | III     | Never smoked    |                                                    |                         | No            | Alive           |
| No.5       | Male   | 72  | Asthma                                                                                      | 2016.09 | Lung cancer                        | IV      | Current smoker  | Targeted therapy (EGFR-TKI) and PD-1 immunotherapy | 2020.01.17              | No            | Alive           |
| No.6       | Male   | 73  | Chronic bronchitis                                                                          | 2019.11 | Laryngeal squamous cell carcinoma  | IV      | Current smoker  | Radiotherapy                                       | 2020.01.22              | Yes           | Alive           |
| No.7       | Male   | 69  | Coronary heart disease, Hypertension                                                        | 2019.08 | Lung cancer                        | I       | Current smoker  | Radiotherapy                                       | 2020.01.21              | No            | Alive           |
| No.8       | Female | 55  | No                                                                                          | 2019.11 | Glioblastoma                       | IV      | Never smoked    | Radiotherapy and chemotherapy                      | 2020.02.06              | No            | Alive           |
| No.9       | Male   | 74  | Duodenal ulcer, COPD, Hypertension, Coronary heart disease                                  | 2019.08 | Esophageal cancer                  | IV      | Current smoker  | Radiotherapy                                       | 2020.01.23              | No            | Alive           |
| No.10      | Male   | 55  | Hepatic encephalopathy, Gastrointestinal bleeding, Chronic viral hepatitis, Anemia          | 2014.01 | Hepatocellular carcinoma           | IV      | Current smoker  | Radiotherapy                                       | 2020.01.14              | No            | Alive           |
| No.11      | Male   | 66  | Hypertension, Diabetes                                                                      | 2019.03 | Lung squamous cell carcinoma       | IV      | Never smoked    | Chemotherapy                                       | 2020.01.22              | Yes           | Alive           |
| No.12      | Male   | 67  | Chronic bronchitis, Hypertension, Atrial fibrillation, Peptic ulcer, Chronic kidney disease | 2019.12 | Esophageal squamous cell carcinoma | III     | Never smoked    | Surgery                                            | 2020.01.01              | Yes           | Dead            |
| No.13      | Male   | 64  | Cerebral infarction                                                                         | 2020.01 | Myelodysplastic syndrome           | Unknown | Current smoker  |                                                    |                         | Yes           | Alive           |
| No.14      | Male   | 83  | Hypertension                                                                                | 2016    | Meningioma                         | Unknown | Never smoked    |                                                    |                         | Yes           | Alive           |
| No.15      | Male   | 73  | Hypertension                                                                                | 2020.01 | Lung cancer                        | I       | Current smoker  | Surgery                                            | 2020.01.16              | Yes           | Alive           |
| No.16      | Female | 48  | No                                                                                          | 2019.06 | Breast cancer                      | II      | Never smoked    |                                                    |                         | No            | Alive           |
| No.17      | Male   | 57  | Prostatic hyperplasia, Male erectile dysfunction                                            | 2016.02 | Lung cancer                        | IV      | Current smoker  | Radiotherapy and Targeted therapy (EGFR-TKI)       | 2020.01.18              | No            | Alive           |
| No.18      | Male   | 61  | No                                                                                          | 2019.12 | Lung squamous cell carcinoma       | IV      | Current smoker  | DP chemotherapy and PD-1 immunotherapy             | 2020.01.16              | Yes           | Dead            |
| No.19      | female | 84  | Hypertension, diabetes, lumbar compression fracture                                         | 2019.06 | Lung cancer                        | Ib      | Never smoked    | Surgery                                            | 2020.01.14              | Yes           | Dead            |
| No.20      | male   | 69  | Abdominal aortic aneurysm                                                                   | 2019.09 | Lung adenocarcinoma                | I       | Never smoked    | Radiotherapy and chemotherapy                      | 2019.12.19              | No            | Alive           |
| No.21      | male   | 69  | Prosopalgia                                                                                 | 2019.11 | Lung squamous cell carcinoma       | IV      | Former smoker   | Chemotherapy and PD-1 immunotherapy                | 2020.01.13              | No            | Alive           |
| No.22      | male   | 65  | Chronic viral hepatitis                                                                     | 2019.04 | Lung cancer                        | III     | Current smoker  |                                                    |                         | No            | Alive           |
| No.23      | female | 76  | Hypertension, renal insufficiency, hypothyroidism, cardiac insufficiency                    | Unknown | Multiple myeloma                   | Unknown | Never smoked    |                                                    |                         | Yes           | Dead            |

|       |        |    |                                                                                     |           |                               |         |                |                                                          |            |     |       |
|-------|--------|----|-------------------------------------------------------------------------------------|-----------|-------------------------------|---------|----------------|----------------------------------------------------------|------------|-----|-------|
| No.24 | male   | 54 | Incomplete ileus                                                                    | 2020.01   | Rectal cancer                 | III     | Never smoked   | Surgery                                                  | 2020.01.16 | No  | Alive |
| No.25 | female | 78 | Hypertension, high heart disease, COPD, coronary heart disease, renal insufficiency | 2014.06   | Chronic granulocytic leukemia | B       | Never smoked   |                                                          |            | Yes | Dead  |
| No.26 | male   | 61 | Hypertension, diabetes                                                              | 2018.05   | Bladder cancer                | III     | Never smoked   |                                                          |            | Yes | Alive |
| No.27 | female | 50 | No                                                                                  | 2017.05   | Lung cancer                   | IB      | Never smoked   |                                                          |            | No  | Alive |
| No.28 | female | 87 | Hypertension                                                                        | 2009      | Gastric cancer                | IIIA    | Never smoked   |                                                          |            | Yes | Alive |
| No.29 | female | 55 | No                                                                                  | 2018      | Cervical cancer               | I       | Never smoked   |                                                          |            | No  | Alive |
| No.30 | female | 70 | Hypertension                                                                        | Unknown   | Colon cancer                  | II      | Never smoked   |                                                          |            | No  | Alive |
| No.31 | female | 69 | No                                                                                  | Unknown   | Gastric cancer                | Unknown | Never smoked   |                                                          |            | No  | Alive |
| No.32 | female | 59 | No                                                                                  | 2009      | Breast cancer                 | IIA     | Never smoked   |                                                          |            | No  | Alive |
| No.33 | female | 48 | No                                                                                  | 2019.06   | Breast cancer                 | II      | Never smoked   | Radiotherapy                                             | 2020.01.23 | No  | Alive |
| No.34 | male   | 57 | No                                                                                  | 2015.12   | Lung adenocarcinoma           | IV      | Current smoker | Concurrent targeted therapy (EGFR-TKI) with radiotherapy | 2020.01.22 | No  | Alive |
| No.35 | male   | 69 | Prosopalgia                                                                         | 2019.11   | Lung squamous cell carcinoma  | IV      | Never smoked   | Radiotherapy and Chemotherapy                            | 2020.01.13 | No  | Alive |
| No.36 | male   | 69 | Chronic viral hepatitis                                                             | 2019.04   | Lung cancer                   | IV      | Current smoker | Chemotherapy and PD-1 immunotherapy                      | 2019.01.05 | Yes | Alive |
| No.37 | male   | 69 | Chronic kidney disease                                                              | 2019.09   | Lung adenocarcinoma           | I       | Current smoker | Chemotherapy and Radiotherapy                            | 2020.01.17 | No  | Alive |
| No.38 | male   | 66 | No                                                                                  | 2019.08   | Lung adenocarcinoma           | IV      | Used to smoke  | PD-1 immunotherapy                                       | 2020.01.17 | Yes | Alive |
| No.39 | male   | 65 | Coronary heart disease                                                              | 2019.04   | Bladder cancer                | IV      | Never smoked   | Radiotherapy and Chemotherapy                            | 2019.12.16 | Yes | Dead  |
| No.40 | male   | 81 | Hypertension                                                                        | 2019.09   | Cancer of unknown primary     | Unknown | Current smoker | PD-1 immunotherapy                                       | 2019.12.04 | Yes | Dead  |
| No.41 | female | 46 | Bacteremia                                                                          | 2019.01   | Rectal cancer                 | III     | Never smoked   |                                                          |            | No  | Alive |
| No.42 | male   | 76 | Intestinal obstruction                                                              | 2018.11   | Rectal cancer                 | IV      | Current smoker |                                                          |            | Yes | Alive |
| No.43 | female | 58 | No                                                                                  | 2020.1.2  | Ovarian cancer                | III     | Never smoked   | Chemotherapy                                             | 2020.01.15 | No  | Alive |
| No.44 | female | 74 | Diabetes                                                                            | 2020.1.12 | Cervical cancer               | IIB     | Never smoked   | Chemotherapy                                             | 2020.01.20 | No  | Alive |
| No.45 | male   | 26 | No                                                                                  | Unknown   | Testicular cancer             | I       | Never smoked   |                                                          |            | No  | Alive |
| No.46 | female | 66 | Hypertension, Hyperlipemia                                                          | Unknown   | Breast cancer                 | II      | Never smoked   |                                                          |            | Yes | Alive |
| No.47 | female | 52 | Diabetes                                                                            | Unknown   | Thyroid carcinoma             | I       | Never smoked   |                                                          |            | No  | Alive |
| No.48 | male   | 50 | Pulmonary tuberculosis, Abdominal infection, Biliary infection, Liver abscess       | 2015      | Thyroid carcinoma             | I       | Current smoker |                                                          |            | No  | Alive |
| No.49 | female | 66 | No                                                                                  | 2019      | Thyroid carcinoma             | Unknown | Never smoked   |                                                          |            | Yes | Alive |
| No.50 | male   | 83 | No                                                                                  | 2019.05   | Prostate cancer               | IV      | Never smoked   |                                                          |            | No  | Alive |
| No.51 | female | 29 | No                                                                                  | 2013.05   | Thyroid carcinoma             | I       | Never smoked   |                                                          |            | No  | Alive |



|       |        |    |                                                          |         |                       |         |                |                          |            |     |       |
|-------|--------|----|----------------------------------------------------------|---------|-----------------------|---------|----------------|--------------------------|------------|-----|-------|
| No.52 | female | 32 | No                                                       | 2018.01 | Thyroid carcinoma     | I       | Never smoked   |                          |            | No  | Alive |
| No.53 | male   | 76 | No                                                       | 2018    | Prostate cancer       | Unknown | Current smoker |                          |            | No  | Alive |
| No.54 | female | 80 | Hypertension, Hyperlipidemia, Phlebothrombosis, Diabetes | 2019.01 | Lung adenocarcinoma   | IIIA    | Never smoked   |                          |            | Yes | Alive |
| No.55 | Male   | 72 | Hypertension                                             | 2019    | Lung cancer           | IV      | Former smoker  |                          |            | Yes | Dead  |
| No.56 | Female | 57 | No                                                       | 2019.12 | Breast cancer         | II      | Never smoked   | Chemotherapy             | 2020.01.27 | No  | Alive |
| No.57 | Female | 69 | Chronic hepatitis                                        | 2018    | Thyroid cancer        | I       | Never smoked   |                          |            | No  | Alive |
| No.58 | Female | 60 | No                                                       | 2012    | Cervical cancer       | II      | Never smoked   |                          |            | No  | Alive |
| No.59 | Female | 72 | Hypertension , heart disease                             | 2013.06 | Breast cancer         | Unknown | Never smoked   |                          |            | No  | Alive |
| No.60 | Male   | 75 | Hypertension                                             | 2009    | Colon cancer          | Unknown | Current smoker |                          |            | No  | Alive |
| No.61 | Male   | 67 | Hypothyroidism                                           | Unknown | Liver cancer          | Unknown | Never smoked   |                          |            | No  | Alive |
| No.62 | Female | 52 | Hypertension , Chronic renal failure                     | 2016.03 | Endometrial cancer    | Ia      | Never smoked   |                          |            | No  | Alive |
| No.63 | Male   | 64 | No                                                       | 2019.08 | Gallbladder carcinoma | Unknown | Never smoked   |                          |            | No  | Alive |
| No.64 | Male   | 67 | No                                                       | 1994    | Nasopharynx cancer    | Unknown | Never smoked   |                          |            | No  | Alive |
| No.65 | Male   | 63 | Hypertension                                             | 2010    | Kidney cancer         | Unknown | Never smoked   |                          |            | No  | Alive |
| No.66 | Male   | 34 | No                                                       | 2017    | Thyroid cancer        | Unknown | Never smoked   |                          |            | No  | Alive |
| No.67 | Female | 59 | No                                                       | 2019.07 | Colon cancer          | Unknown | Never smoked   | Chemotherapy             | 2020.01.01 | No  | Alive |
| No.68 | Male   | 57 | Cirrhosis, diabetes                                      | 2020.01 | Nasopharynx cancer    | Unknown | Current smoker | Chemotherapy             | 2020.01.14 | No  | Alive |
| No.69 | Male   | 62 | No                                                       | 2015    | Bladder cancer        | Unknown | Never smoked   |                          |            | No  | Alive |
| No.70 | Female | 66 | No                                                       | 2015    | Thyroid cancer        | Unknown | Never smoked   |                          |            | No  | Alive |
| No.71 | Male   | 60 | No                                                       | 2015    | Multiple myeloma      | Unknown | Never smoked   |                          |            | No  | Alive |
| No.72 | Female | 64 | No                                                       | Unknown | Gastric stromal tumor | Unknown | Never smoked   |                          |            | No  | Alive |
| No.73 | Female | 66 | No                                                       | 2004    | Ocular malignancy     | Unknown | Never smoked   |                          |            | No  | Alive |
| No.74 | Male   | 61 | Coronary heart disease, Hypertension                     | 2020.01 | Multiple myeloma      | Unknown | Never smoked   |                          |            | No  | Alive |
| No.75 | Female | 53 | No                                                       | 2019.9  | Multiple myeloma      | Unknown | Never smoked   |                          |            | No  | Alive |
| No.76 | Male   | 61 | Diabetes, Hypertension                                   | Unknown | Malignant lymphoma    | IV      | Never smoked   |                          |            | Yes | Dead  |
| No.77 | Female | 54 | No                                                       | 2019.03 | Lung carcinoma        | II      | Never smoked   |                          |            | Yes | Dead  |
| No.78 | Female | 55 | No                                                       | 2016    | Breast cancer         | I       | Never smoked   |                          |            | No  | Alive |
| No.79 | Female | 38 | No                                                       | 2019    | Breast cancer         | II      | Never smoked   |                          |            | No  | Alive |
| No.80 | Female | 50 | No                                                       | 2019    | Rectal carcinoma      | IV      | Current smoker |                          |            | Yes | Dead  |
| No.81 | Male   | 67 | Bronchitis                                               | 2017.12 | Esophageal carcinoma  | IIIA    | Current smoker |                          |            | Yes | Alive |
| No.82 | Female | 37 | No                                                       | 2018    | Thyroid carcinoma     | I       | Former smoker  |                          |            | No  | Alive |
| No.83 | Female | 45 | No                                                       | 2019.11 | Cervical carcinoma    | IIA     | Never smoked   | Surgery and Radiotherapy | 2020.01.01 | Yes | Alive |
| No.84 | Male   | 35 | No                                                       | 2019.07 | Glioma                | Unknown | Never smoked   |                          |            | Yes | Alive |

|        |        |    |                                                        |         |                              |      |                |                                      |            |     |       |
|--------|--------|----|--------------------------------------------------------|---------|------------------------------|------|----------------|--------------------------------------|------------|-----|-------|
| No.85  | Female | 57 | No                                                     | 2019.11 | Cervical carcinoma           | Ib   | Former smoker  | Surgery                              | 2020.01.10 | No  | Alive |
| No.86  | Female | 49 | No                                                     | 2019.11 | Renal carcinoma              | I    | Never smoked   |                                      |            | No  | Alive |
| No.87  | Male   | 62 | Hypertension, Tuberculosis                             | 2018.08 | Esophageal carcinoma         | I    | Current smoker |                                      |            | No  | Alive |
| No.88  | Male   | 70 | Coronary heart disease,<br>Cholelithiasis              | 2019.06 | Gastric carcinoma            | I    | Current smoker |                                      |            | No  | Alive |
| No.89  | Male   | 44 | No                                                     | 2019.12 | Thyroid carcinoma            | I    | Current smoker |                                      |            | No  | Alive |
| No.90  | Female | 72 | Cerebrovascular disease                                | 2017.06 | Breast cancer                | II   | Never smoked   |                                      |            | No  | Alive |
| No.91  | Female | 57 | Hypertension                                           | 2019.02 | Breast cancer                | I    | Never smoked   |                                      |            | Yes | Alive |
| No.92  | Female | 56 | No                                                     | 2019.04 | Cervical carcinoma           | IB2  | Never smoked   |                                      |            | Yes | Alive |
| No.93  | Male   | 58 | No                                                     | 2019.06 | Rectal carcinoma             | IV   | Former smoker  | Chemotherapy                         | 2020.01.01 | Yes | Alive |
| No.94  | Male   | 71 | Coronary heart disease<br>Hypertension                 | 2019.10 | Lung squamous cell carcinoma | IV   | Never smoked   | Chemotherapy                         | 2020.01.06 | Yes | Alive |
| No.95  | Female | 67 | Diabetes,<br>Hypertension                              | 2019.12 | Breast cancer                | III  | Current smoker | Surgery                              | 2020.01.01 | Yes | Alive |
| No.96  | Male   | 70 | No                                                     | 2019.11 | gastric carcinoma            | IIIA | Never smoked   | Chemotherapy                         | 2020.01.01 | Yes | Alive |
| No.97  | Male   | 70 | Hypertension                                           | 2014    | Esophageal carcinoma         | II   | Current smoker |                                      |            | Yes | Alive |
| No.98  | Female | 42 | Hypertension                                           | 2020.01 | Pancreatic cancer            | III  | Never smoked   | Surgery                              | 2020.01.01 | No  | Alive |
| No.99  | Male   | 43 | No                                                     | 2011    | gastric carcinoma            | I    | Never smoked   |                                      |            | Yes | Alive |
| No.100 | Male   | 69 | No                                                     | 2015    | Lung cancer                  | II   | Current smoker |                                      |            | Yes | Alive |
| No.101 | Male   | 62 | Cerebral hemorrhage, Uremia,<br>Diabetes, Hypertension | 2020.01 | Lung cancer                  | III  | Current smoker |                                      |            | No  | Alive |
| No.102 | Male   | 37 | Hyperlipidemia                                         | 2018.06 | Sigmoid colon cancer         | II   | Never smoked   |                                      |            | Yes | Alive |
| No.103 | Female | 70 | Coronary heart disease, Hypertension                   | 2002    | Thyroid cancer               | I    | Never smoked   |                                      |            | Yes | Alive |
| No.104 | Male   | 51 | No                                                     | 2015    | Leukemia                     | II   | Never smoked   | Targeted therapy (Imatinib Mesylate) | 2020.02.08 | No  | Alive |
| No.105 | Female | 55 | Hypertension                                           | 2019.07 | Nasopharyngeal lymphoma      | II   | Never smoked   |                                      |            | No  | Alive |

Time\*: Time of Preliminary Diagnosis; COPD=Chronic Obstructive Pulmonary Disease; EGFR-TKI=Epidermal growth factor receptor-tyrosine kinase; PD-1=Programmed cell death protein 1.

**Supplementary Table 5. Logistic regression results of COVID-19 patients with cancer adjusted by immunosuppression levels**

| Outcome         | Odds Ratio | 95%CI lower | 95%CI upper | p value | Features                 |
|-----------------|------------|-------------|-------------|---------|--------------------------|
| Death           | 16.642     | -4.653      | 37.937      | 0.238   | Age                      |
|                 | 0.575      | -3.925      | 5.074       | 0.505   | Sex                      |
|                 | 1.755      | -3.240      | 6.749       | 0.548   | Diabetes                 |
|                 | 2.477      | -1.683      | 6.638       | 0.228   | Hypertension             |
|                 | 2.404      | -6.866      | 11.674      | 0.572   | COPD                     |
|                 | 1.941      | -2.636      | 6.518       | 0.434   | Smoking                  |
|                 | 1.184      | -1.368      | 3.736       | 0.522   | Immunosuppression levels |
| ICU             | 2.660      | -8.587      | 13.907      | 0.576   | Age                      |
|                 | 1.039      | -2.603      | 4.680       | 0.951   | Sex                      |
|                 | 2.914      | -1.333      | 7.161       | 0.167   | Diabetes                 |
|                 | 2.279      | -1.335      | 5.893       | 0.178   | Hypertension             |
|                 | 1.938      | -7.073      | 10.949      | 0.664   | COPD                     |
|                 | 1.032      | -2.732      | 4.795       | 0.962   | Smoking                  |
|                 | 1.238      | -1.201      | 3.676       | 0.329   | Immunosuppression levels |
| Severe symptoms | 6.993      | -2.350      | 16.336      | 0.213   | Age                      |
|                 | 1.019      | -2.425      | 4.463       | 0.974   | Sex                      |
|                 | 2.611      | -1.838      | 7.059       | 0.242   | Diabetes                 |
|                 | 3.936      | 0.505       | 7.367       | 0.014   | Hypertension             |
|                 | 0.343      | -8.636      | 9.323       | 0.482   | COPD                     |
|                 | 1.767      | -1.728      | 5.261       | 0.325   | Smoking                  |
|                 | 1.480      | -0.934      | 3.894       | 0.060   | Immunosuppression levels |
| IMV             | 0.350      | -18.384     | 19.085      | 0.642   | Age                      |
|                 | 1.346      | -2.967      | 5.659       | 0.706   | Sex                      |
|                 | 4.598      | -0.187      | 9.384       | 0.087   | Diabetes                 |
|                 | 2.636      | -1.809      | 7.081       | 0.236   | Hypertension             |
|                 | NA         | NA          | NA          | NA      | COPD                     |
|                 | 0.850      | -3.768      | 5.469       | 0.850   | Smoking                  |
|                 | 1.448      | -1.156      | 4.053       | 0.192   | Immunosuppression levels |

Abbreviations: ICU=intensive care unit; IMV=invasive mechanical ventilation; COPD=Chronic Obstructive Pulmonary Disease.

Immunosuppression level was evaluated according to WHO guidelines.
